# Supplementary material for: Charge-controlled nano-structuring in partially collapsed star-shaped macromolecules
Source: Royal Society of Chemistry journal article supplement (doi:10.1039/c6sm00109b), 2016-01-01
Supplement: c6sm00109b1.pdf [file c6sm00109b1.pdf]

# Electronic supporting information

## Charge-controlled nano-structuring in partially collapsed star-shaped macromolecules

Filip Uhlík and Peter Košovan

*Department of Physical and Macromolecular Chemistry, Faculty of Science,  
Charles University in Prague, Hlavova 8, 128 00 Praha 2, Czech Republic*

Ekaterina B. Zhulina

*Institute of Macromolecular Compounds of the Russian Academy of Sciences, 199004 St. Petersburg, Russia; St. Petersburg  
National Research University of Information technologies, mechanics and Optics, 197101, St. Petersburg, Russia*

Oleg V. Borisov

*Institute of Macromolecular Compounds of the Russian Academy of Sciences, 199004 St. Petersburg,  
Russia; CNRS, UMR 5254 – IPREM – Institut des Sciences Analytiques et de Physico-Chimie pour  
l'Environnement et les Matériaux, 2 avenue du Président Angot, 64053 Pau, France*

*e-mail: oleg.borisov@univ-pau.fr*

(Dated: March 15, 2016)

| $K_A$              | $p = 2$  | $p = 10$ | $p = 20$ |
|--------------------|----------|----------|----------|
| $1 \times 10^{-5}$ | 0.196(1) | 0.065(1) | 0.043(1) |
| $5 \times 10^{-5}$ | 0.396(1) | 0.103(1) | 0.059(1) |
| $1 \times 10^{-4}$ | 0.478(1) | 0.176(1) | 0.090(1) |
| $2 \times 10^{-4}$ | 0.566(1) | 0.294(1) | 0.144(1) |
| $5 \times 10^{-4}$ | 0.685(1) | 0.428(1) | 0.291(1) |
| $1 \times 10^{-3}$ | 0.770(1) | 0.522(1) | 0.415(1) |

TABLE I. Values of the average degree of ionization,  $\alpha$ , obtained from the simulations at different input values of  $K_A$  (with standard deviations on the last digit given in parentheses) for various numbers of arms,  $p$ . We systematically varied  $K_A$  of the weak PEs, and  $\alpha$  was obtained from the simulation as a result of complex interplay between ionization and conformation of the macromolecules. In contrast, for the strong PEs we set the degree ionization to be  $\alpha = 1/m$  using a repeating sequence of  $m - 1$  uncharged monomers followed by one charged.

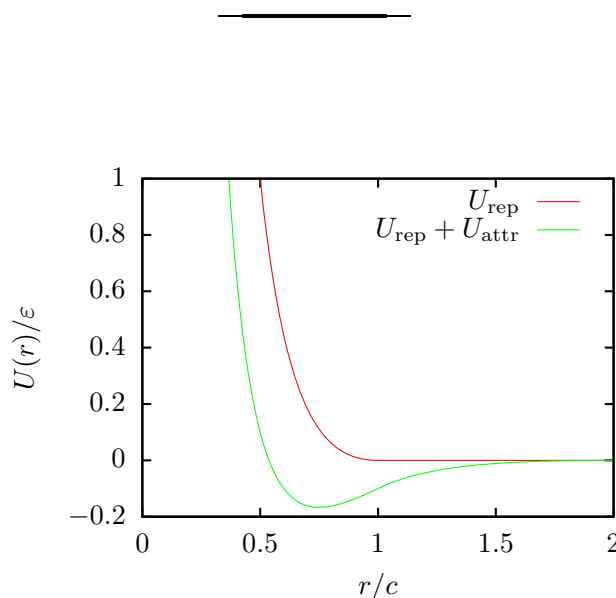

FIG. 1. The repulsive and attractive short-range interaction potentials.

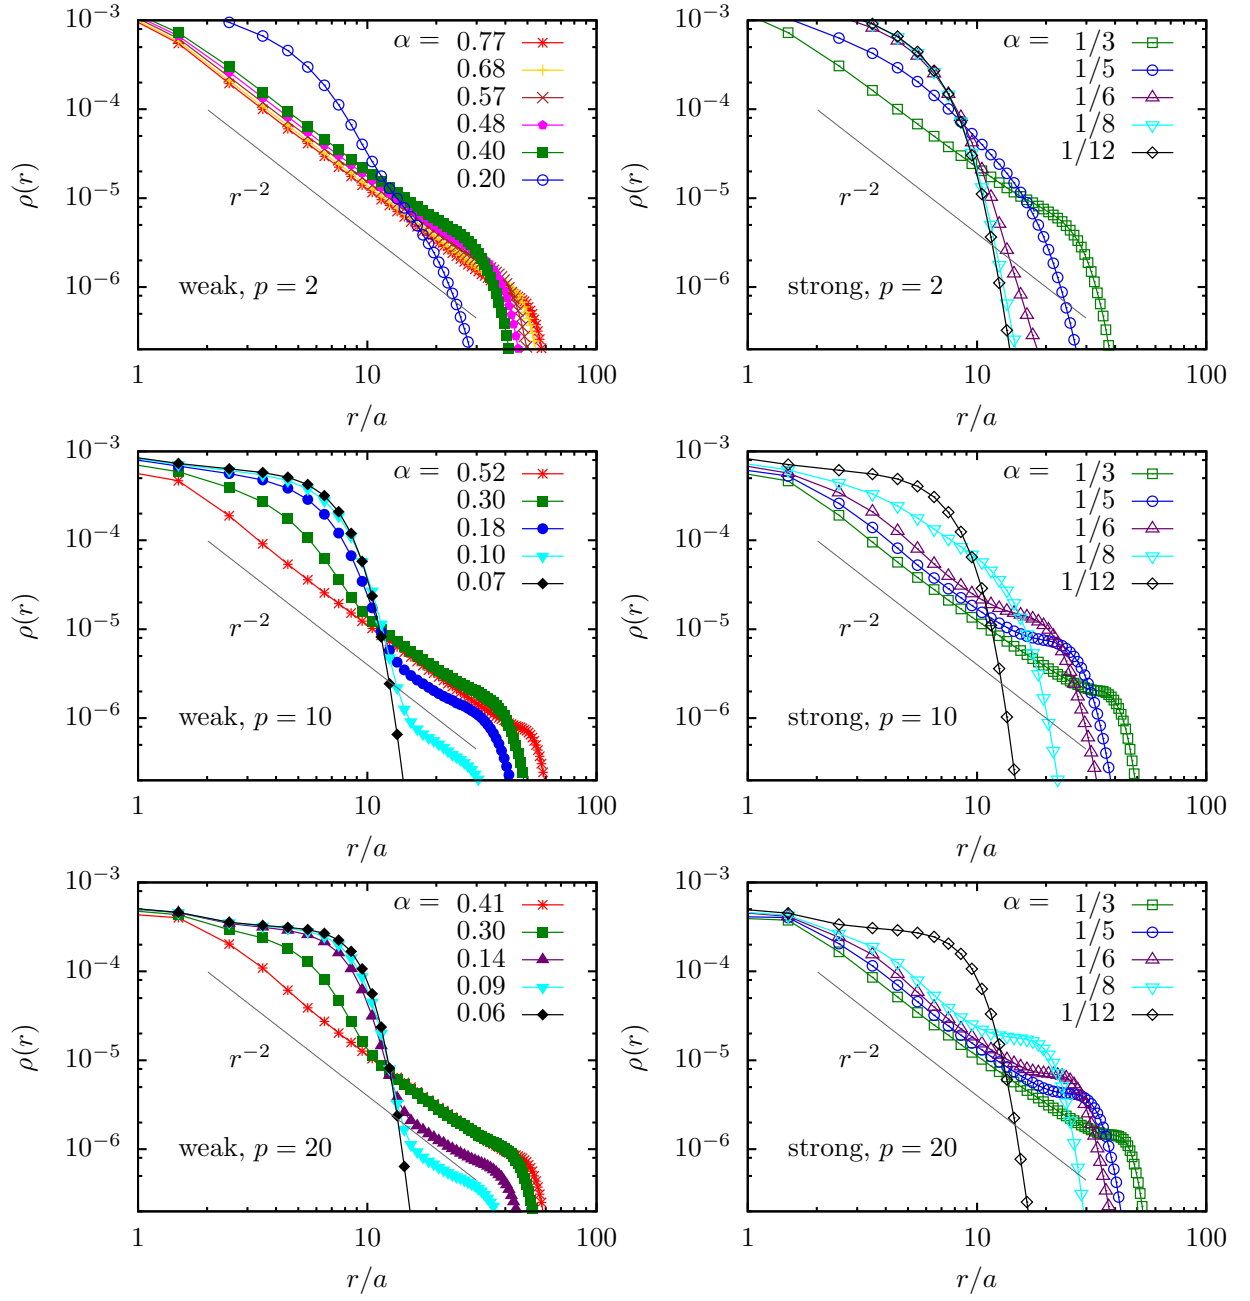

FIG. 2. Radial segment density profile for weak (left) and strong (right) PE stars with  $p = 2$  (top),  $p = 10$  (middle) and  $p = 20$  (bottom).

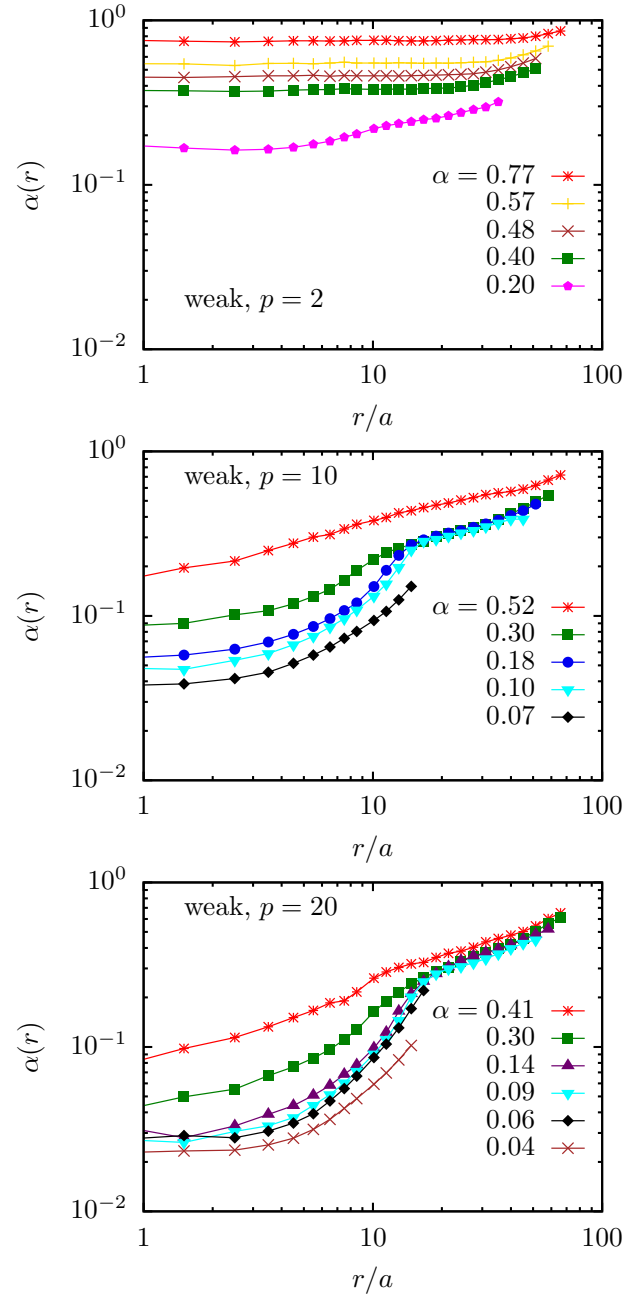

FIG. 3. Radial profile of degree of dissociation for weak PE stars with  $p = 2$  (top),  $p = 10$  (middle) and  $p = 20$  (bottom).

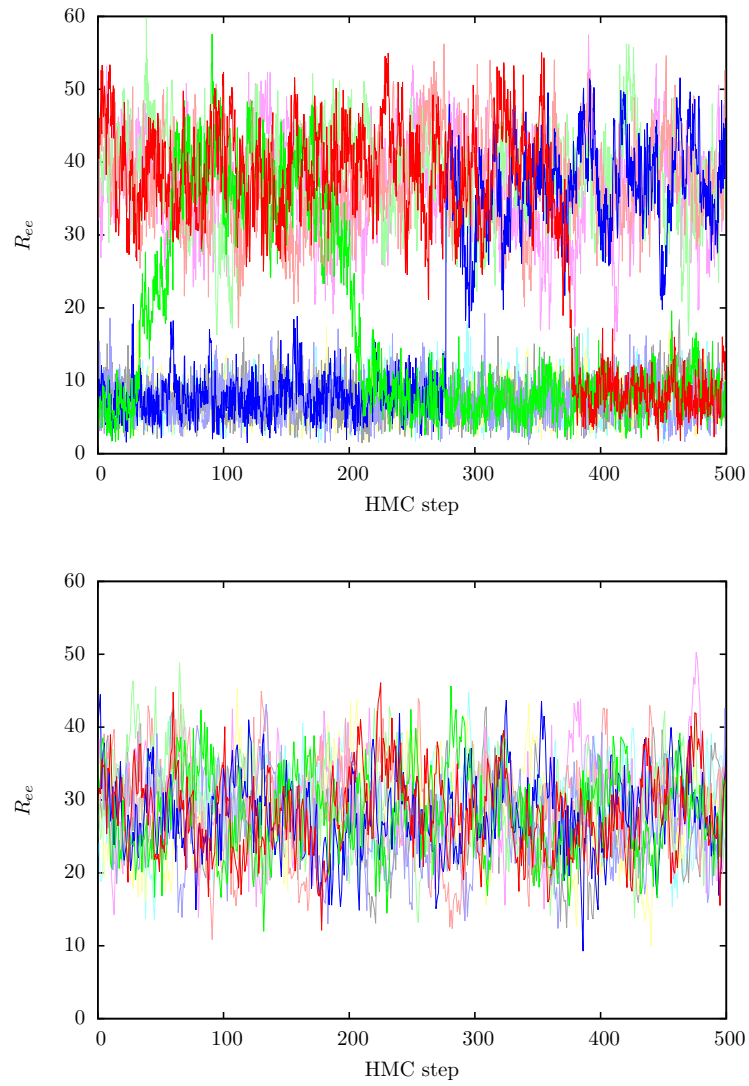

FIG. 4. Sample traces of the end-to-end distances of individual arms (in different colours) for the weak polyelectrolyte star (left) and the strong one (right) with  $p = 10$  arms and  $\alpha \approx 0.2$ . In the weak case, clear bimodality is seen, which is absent in the strong case. Some arms repeatedly change their state between stretched and collapsed within the depicted frame, which confirms that the system is not frozen in the core-shell structure. The plots include about 1/20 of the whole simulation.
